# Supplementary material for: Association of Fluid Management with Outcome in Invasively Ventilated COVID–19 ARDS Patients – Insights From the PRoVENT-COVID Study: A National, Multicenter, Observational Cohort Analysis.
Source: Research Square preprint supplement (doi:10.21203/rs.3.rs-1293335/v1), 2022-01-28
Supplement: Supplementary file 1 [file 00f35a1491e7eee5946fc37c.docx]

**Association of Fluid Management with Outcome in Invasively Ventilated COVID–19 ARDS Patients – insights from the PRoVENT–COVID study: a national, multicenter, observational cohort analysis**

**Additional File 1**

Sanchit Ahuja1,2, Harm-Jan de Grooth3, Frederique Paulus4,5, Fleur L. van der Ven4, Ary Serpa Neto6,7,8, Marcus J. Schultz4,9,10, Pieter R. Tuinman3, for the PRoVENT-COVID Study Collaborative Group* ‘PRactice of VENTilation in COVID–19’

1Department of Anesthesiology, Pain Management & Perioperative Medicine, Henry Ford Hospital, Detroit, Michigan, USA

2Outcomes Research Consortium, Cleveland Clinic, Cleveland, Ohio, USA

3Department of Intensive Care, Amsterdam UMC, location VU Medical Center, Amsterdam, The Netherlands

4Department of Intensive Care, Amsterdam UMC, location AMC, Amsterdam, The Netherlands

5ACHIEVE, Centre of Applied Research, Amsterdam University of Applied Sciences, Faculty of Health, Amsterdam, The Netherlands

6Department of Critical Care Medicine, Melbourne Medical School, University of Melbourne, Austin Hospital, Melbourne, Australia.

7Australian and New Zealand Intensive Care Research Centre (ANZIC-RC), School of Public Health and Preventive Medicine, Monash University, Melbourne, Australia.

8Department of Critical Care Medicine, Hospital Israelita Albert Einstein, São Paulo, Brazil.

9Mahidol Oxford Tropical Medicine Research Unit (MORU), Mahidol University, Bangkok, Thailand

10Nuffield Department of Medicine, University of Oxford, Oxford, UK

**Correspondence:**

Prof. Marcus J. Schultz, MD PhD

Department of Intensive Care, C3–415, Academic Medical Center, Meibergdreef 9

1105 AZ Amsterdam, The Netherlands

Email: [m.j.schultz@amsterdamumc.nl](mailto:m.j.schultz@amsterdamumc.nl)

**Table of Contents:**

**Supplementary Figure 1 a** Histogram of model residuals showing zero-inflated count

distributions. **b** Predicted values vs. model residuals.

**Supplementary Figure 2** Models with different spline complexities

**Supplementary Figure 3** Box and violin plots of cumulative fluid balance over days 0-3

**Supplementary Table 1** Potential predefined confounding variables

**Supplementary Table 2** Senstivity analysis to missing data and imputation method


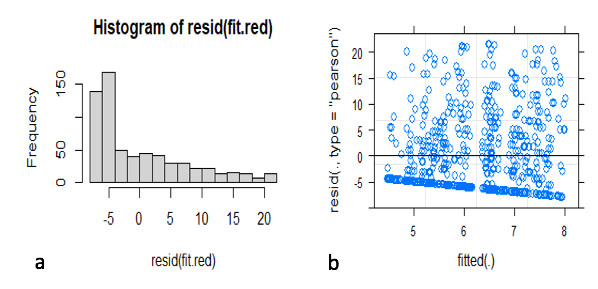


**Supplementary Figure 1**: After fitting the prespecified linear model regressing ventilator-free days on cumulative fluid balance at day 3, the residuals were found to be poorly distributed because of the relative overabundance of cases with 0 ventilator-free days (i.e., the distribution was severely zero-inflated). Based on these findings, this model was abandoned and all reported results were based on other methods. **a** Histogram of model residuals showing severe skewness as a consequence of zero-inflated count distributions. **b** Predicted values vs. model residuals.


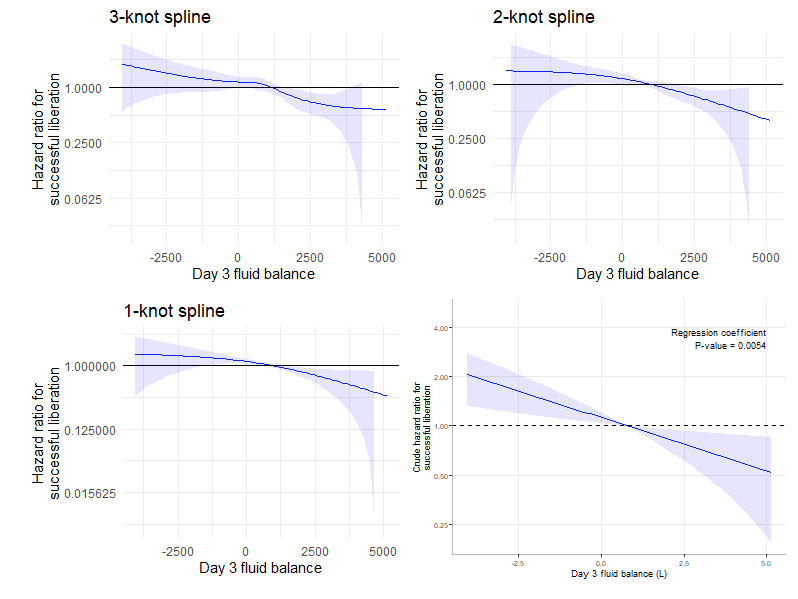


**Supplementary Figure 2:** Models regressing the hazard of successful liberation on day 3 fluid balance with different spline complexities. The Akaike Information Criterion (AIC) for the four models was 4381, 4379, 4377 and 4376, in descending order of model complexity. Therefore, the no-spline model (AIC 4376) was found to be most parsimonious and was used for the main analyses.


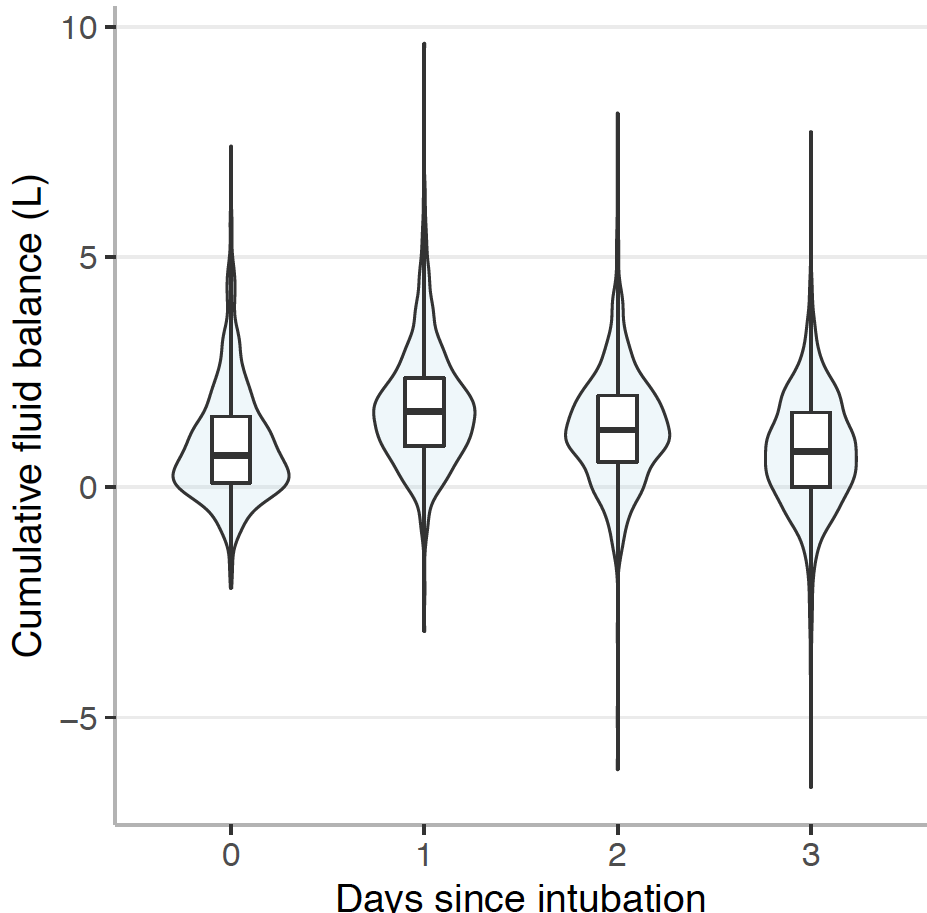


**Supplementary Figure 3**: Box and violin plots of cumulative fluid balance over days 0-3

**Supplementary Table 1**: Potential confounding variables

| **Confounding Variables** | **Hazards ratio, (95% CI)** | **P value** |
| --- | --- | --- |
| cFB at day 3, ml | 0.99, (0.99-1.00) | 0.005 |
| Sex | 0.78, (0.60-1.04) | 0.096 |
| Age | 0.95, (0.94-0.96) | 0.001 |
| Body mass index (kg/m2) | 0.99, (0.97-1.01) | 0.643 |
| Creatinine at day 0 | 0.99, (0.98-0.99) | 0.012 |
| Norepinephrine dose, calculated log dose at day 0 | 1.02, (0.97-1.07) | 0.289 |
| Tidal volume at day 0 (expired) | 1.00, (0.99-1.00) | 0.645 |
| pH at day 0 | 7.01, (2.38-20.64) | 0.0004 |
| Heart rate at day 0 | 0.99, (0.99-1.00) | 0.131 |
| PEEP at day 0 | 0.97, (0.92-1.01) | 0.220 |
| PaO2/FiO2 at day 0 | 0.99, (0.99-1.00) | 0.091 |
| Dynamic compliance (Cdyn) at day 0 | 1.00, (0.99-1.00) | 0.776 |
| Lactate at day 0 | 0.98, (0.8840-1.09) | 0.794 |

The hazards ratios were estimated using Cox proportional hazard model, adjusted for predefined confounding variables. Abbreviations. cFB cumulative fluid balance, PEEP positive endexpiratory pressure, PaO2/FiO2 PaO2 arterial partial pressure of oxygen/Fraction of inspired oxygen. Note that the hazard ratio for day 3 cFB is expressed here per milliliter.

**Supplementary Table 2:** Senstivity analysis to missing data and imputation method

|  | **Hazards ratio, (95% CI)** | **P value** |
| --- | --- | --- |
| cFB at day 3, ml | 0.99, (0.99, 1.00) | 0.02 |
| Sex | 0.819, (0.60, 1.11) | 0.2 |
| Age | 0.956, (0.94, 0.96) | <0.001 |
| Creatinine at day 0 | 0.994, (0.989, 0.987) | 1 |
| pH at day 0 | 18.1444, (3.58, 91.74) | 0.0004 |
| PaO2/FiO2 | 0.9987, (0.99, 1.00) | 0.15 |

The hazards ratios were estimated using Cox proportional hazard model, adjusted for missing data and imputation method. Abbreviations. cFB cumulative fluid balance, PaO2/FiO2 PaO2 arterial partial pressure of oxygen/Fraction of inspired oxygen. Note that the hazard ratio for day 3 cFB is expressed here per milliliter.

*Acknowledgements*: ***PRoVENT-COVID Collaborative Group.** *Investigators:* (in alphabetic order): S. Ahuja1; J.P. van Akkeren2; A.G. Algera3; C.K. Algoe3; R.B. van Amstel3; A. Artigas4; O.L. Baur3; P. van de Berg5; A.E. van den Berg6; D.C.J.J. Bergmans7; D.I. van den Bersselaar3; F.A. Bertens3; A.J.G.H. Bindels5; M.M. de Boer3; S. den Boer8; L.S. Boers3; M. Bogerd3; L.D.J. Bos3; M. Botta3; J.S. Breel9; H. de Bruin3; S. de Bruin3; C.L. Bruna3; L.A. Buiteman–Kruizinga10; O. L. Cremer11; R.M. Determann12; W. Dieperink13; D.A. Dongelmans3; H.S. Franke13; M.S. Galek-Aldridge3; M.J. de Graaff14; L.A. Hagens3; J.J. Haringman16; S.T. van der Heide3; P.L.J. van der Heiden10; N.F.L. Heijnen15; S.J.P. Hiel2; L.L. Hoeijmakers3; L. Hol3,9; M.W. Hollmann9; M.E. Hoogendoorn16; J. Horn3; R. van der Horst17; E.L.K. Ie3; D. Ivanov3; N.P. Juffermans12; E. Kho3; E.S. de Klerk9; A.W.M.M. Koopman-van Gemert18; M. Koopmans12; S. Kucukcelebi3; M.A. Kuiper19; D.W. de Lange11; N. van Mourik3; S.G. Nijbroek3,9; M. Onrust13; E.A.N. Oostdijk20; F. Paulus3,21; C.J. Pennartz3; J. Pillay3,13; L. Pisani3; I.M. Purmer6; T.C.D. Rettig22; J.P. Roozeman3; M.T.U. Schuijt3; M.J. Schultz3,23,24; A. Serpa Neto25; M.E. Sleeswijk26; M.R. Smit3; P.E. Spronk27; W. Stilma3; A.C. Strang28; A.M. Tsonas3; P.R. Tuinman29; C.M.A. Valk3; F.L. Veen-Schra16; L.I. Veldhuis3; P. van Velzen30; W.H. van der Ven9; A.P.J. Vlaar3; P. van Vliet31; P.H.J. van der Voort13; L. van Welie32; H.J.F.T. Wesselink16; H.H. van der Wier-Lubbers16; B. van Wijk3; T. Winters3; W.Y. Wong3; A.R.H. van Zanten32.

*Institutional and Departmental Affiliations:* 1Department of Anesthesiology, Pain Management & Perioperative Medicine**, Henry Ford Health System, Detroit, Michigan, United States;** 2Department of Intensive Care**, Maxima Medical Center, Eindhoven, The Netherlands**; 3Department of Intensive Care, **Amsterdam University Medical Centers, location ‘Academic Medical Center’, Amsterdam, The Netherlands**; 4Critical Care Center, **Sabadell Hospital, Sabadell, Spain**;5Department of Intensive Care, **Catharina Hospital**, **Eindhoven, The Netherlands**; 6Department of Intensive Care, **Haga Hospital, the Hague, The Netherlands;** 7Department of Intensive Care, **Maastricht University Medical Center, Maastricht, The Netherlands**;8Department of Intensive Care, **Spaarne Hospital, Haarlem, The Netherlands**; 9Department of Anaesthesiology, **Amsterdam University Medical Centers, location ‘Academic Medical Center’, Amsterdam, The Netherlands**; 10Department of Intensive Care, **Reinier de Graaf Hospital, Delft, The Netherlands**;11Department of Intensive Care, **University Medical Center Utrecht, Utrecht, The Netherlands**; 12Department of Intensive Care, **OLVG Hospital, location East, Amsterdam, The Netherlands**; 13Department of Intensive Care, **University Medical Center Groningen, Groningen, The Netherlands**; 14Department of Intensive Care, **Sint Antonius Hospital, Nieuwegein, The Netherlands**;15Department of Intensive Care, Maastricht University Medical Center, **Maastricht, The Netherlands;** 16 Department of Intensive Care, **Isala Hospital, Zwolle, The Netherlands**; 17Department of Intensive Care; **Zuyderland Hospital, Heerlen and Sittard, The Netherlands**;18Department of Intensive Care **ZGT Hospital, Almelo, The Netherlands**;19Department of Intensive Care **Medical Center Leeuwarden, Leeuwarden, The Netherlands**;20Department of Intensive Care; **Maasstad Hospital, Rotterdam, The Netherlands**; 21ACHIEVE,Center of Applied Research **Amsterdam University of Applied Sciences, Faculty of Health, Amsterdam, The Netherlands**; 22Department of Intensive Care **Amphia Hospital, Breda, The Netherlands**; 23Mahidol–Oxford Tropical Medicine Research Unit (MORU), **Mahidol University, Bangkok, Thailand**; 24Nuffield Department of Medicine, **University of Oxford, Oxford, United Kingdom**; 25Department of Critical Care Medicine, **Australian and New Zealand Intensive Care Research Center (ANZIC-RC), Monash University, Melbourne, Australia**; 26Department of Intensive Care, **FlevoHospital, Almere, The Netherlands**; 27Department of Intensive Care, **Gelre Hospital, Apeldoorn and Zutphen, The Netherlands**:; 28Department of Intensive Care, **Rijnstate Hospital, Arnhem, The Netherlands**; 29Department of Intensive Care, **Amsterdam University Medical Centers, location ‘VU Medical Center’, Amsterdam, The Netherlands**; 30Department of Intensive Care, **Dijklander Hospital, location Hoorn, Hoorn, The Netherlands**; 31Department of Intensive Care **Haaglanden Medical Center, location Westeinde, the Hague, The Netherlands**; 32Department of Intensive Care **Gelderse Vallei Hospital, Ede, The Netherlands**.
